# Supplementary material for: C–H…X (X = F, Cl, Br, I) Versus π-Stacking in the Crystal Packing of Compounds Containing the {M(tpy)X3} Motif
Source: MDPI journal article supplement (doi:10.3390/cryst13060885), 2023-05-28
Supplement: s1 [file s1]

## Supporting Materials

### C–H...X (X = F, Cl, Br, I) versus $\pi$ -stacking in the crystal packing of compounds containing the {M(tpy)X<sub>3</sub>} motif

Catherine E. Housecroft\* and Edwin C. Constable

Table S1. Crystallographic cell dimensions for the compounds in Table 1 of the manuscript.

| CSD<br>Refcode | Space<br>group          | Temp. / K <sup>a</sup> | <i>a</i> / Å | <i>b</i> / Å | <i>c</i> / Å | $\alpha$ / ° | $\beta$ / ° | $\gamma$ / ° |
|----------------|-------------------------|------------------------|--------------|--------------|--------------|--------------|-------------|--------------|
| QQQCB          | <i>P2<sub>1</sub>/c</i> | 295                    | 8.346        | 14.063       | 14.172       | 90           | 111.08      | 90           |
| TPYGAC         | <i>P2<sub>1</sub>/c</i> | 295                    | 8.324        | 14.12        | 14.223       | 90           | 110.77      | 90           |
| TPYGAC01       | <i>P2<sub>1</sub>/n</i> | 123                    | 8.2492       | 14.177       | 13.7119      | 90           | 104.217     | 90           |
| TERPIN         | <i>P2<sub>1</sub>/c</i> | 295                    | 8.582        | 14.155       | 14.36        | 90           | 109.32      | 90           |
| TERPIN01       | <i>P2<sub>1</sub>/n</i> | 103                    | 8.4662       | 14.113       | 14.1329      | 90           | 106.253     | 90           |
| TERPIN02       | <i>P2<sub>1</sub>/n</i> | 293                    | 8.5764       | 14.1465      | 14.0909      | 90           | 105.818     | 90           |
| TERPTL         | <i>P2<sub>1</sub>/c</i> | 295                    | 8.637        | 14.198       | 14.43        | 90           | 108.62      | 90           |
| KEZZOH         | <i>P2<sub>1</sub>/n</i> | 100                    | 8.5434       | 13.9045      | 14.0175      | 90           | 106.779     | 90           |
| PAXVAM         | <i>P2<sub>1</sub>/n</i> | 223                    | 8.3949       | 14.291       | 13.693       | 90           | 105.318     | 90           |
| HUJKIG         | <i>P2<sub>1</sub>/n</i> | 160                    | 8.256        | 14.0522      | 13.6961      | 90           | 104.912     | 90           |
| HUJKIG02       | <i>P2<sub>1</sub>/n</i> | 100                    | 8.2732       | 14.113       | 13.787       | 90           | 104.987     | 90           |
| CUBQEV         | <i>P2<sub>1</sub>/n</i> | 295                    | 8.3834       | 14.101       | 14.734       | 90           | 104.68      | 90           |
| BONRAY         | <i>P2<sub>1</sub>/n</i> | 120                    | 8.2641       | 14.0199      | 13.6468      | 90           | 105.073     | 90           |
| WOLDOQ         | <i>P2<sub>1</sub>/n</i> | 173                    | 8.3436       | 14.0986      | 13.7754      | 90           | 104.868     | 90           |
| LOBXAD         | <i>P2<sub>1</sub>/n</i> | 123                    | 8.3602       | 14.5133      | 13.9874      | 90           | 104.967     | 90           |
| RARVIT         | <i>P2<sub>1</sub>/n</i> | 120                    | 8.4851       | 14.3395      | 13.9396      | 90           | 106.309     | 90           |
| BONREC         | <i>P2<sub>1</sub>/n</i> | 120                    | 8.4381       | 14.3627      | 13.9568      | 90           | 106.42      | 90           |

<sup>a</sup> Temperature of X-ray diffraction data collection.

**Table S2.** C–H3/H4/H5...Cl<sub>ax</sub> interactions in isostructural octahedral [M(tpy)X<sub>3</sub>] compounds, X = Cl or Br. The interactions are defined in Figure 3b in the manuscript.

| REFCODE<br>Space Group                        | M  | X  | Within a chain: <sup>a</sup><br>C–H...X <sub>ax</sub> ;<br>C...X <sub>ax</sub> /Å;<br>∠C–H3/3'...X <sub>eq</sub> /° | Between chains: <sup>b</sup><br>C–H...X <sub>ax</sub> ;<br>C...X <sub>ax</sub> /Å;<br>∠C–H3/3'...X <sub>eq</sub> /° | Between sets of chains: <sup>c</sup><br>C–H...X <sub>ax</sub> ;<br>C...X <sub>ax</sub> /Å;<br>∠C–H3/3'...X <sub>eq</sub> /° | Ref.                                    |
|-----------------------------------------------|----|----|---------------------------------------------------------------------------------------------------------------------|---------------------------------------------------------------------------------------------------------------------|-----------------------------------------------------------------------------------------------------------------------------|-----------------------------------------|
| TPYGAC01<br><i>P</i> <sub>21</sub> / <i>n</i> | Ga | Cl | 2.775, 2.797;<br>3.664(2), 3.717(2);<br>138.7, 142.1                                                                | 2.759, 2.931, 2.592;<br>3.455(2), 3.545(2),<br>3.633(2);<br>123.4, 113.5, 157.3                                     | 2.687, 3.008;<br>3.424(2), 3.565(2);<br>124.6, 112.3                                                                        | [Error!<br>Bookmark<br>not<br>defined.] |
| TERPIN01<br><i>P</i> <sub>21</sub> / <i>n</i> | In | Cl | 2.717, 2.837;<br>3.625(3), 3.806(2);<br>140.7, 148.2                                                                | 2.665, 3.082, 2.644;<br>3.431(2), 3.613(3),<br>3.632(3);<br>126.9, 111.9, 147.9                                     | 2.644, 3.297;<br>3.484(3), 3.780(3);<br>133.5, 108.1                                                                        | [Error!<br>Bookmark<br>not<br>defined.] |
| TERPIN02<br><i>P</i> <sub>21</sub> / <i>n</i> | In | Cl | 2.769, 2.880;<br>3.662(4), 3.836(3);<br>130.1, 146.6                                                                | 2.680, 3.169, 2.682;<br>3.469(3), 3.701(4),<br>3.658(4);<br>128.9, 111.0, 148.9                                     | 2.671, 3.276;<br>3.490(4), 3.769(3);<br>131.6, 108.7                                                                        | [Error!<br>Bookmark<br>not<br>defined.] |
| KEZZOH<br><i>P</i> <sub>21</sub> / <i>n</i>   | Sc | Cl | 2.701, 2.854;<br>3.617(7), 3.804(6);<br>141.4, 145.8                                                                | 2.662, 3.113, 2.639;<br>3.631(7), 3.641(7),<br>3.413(6);<br>127.5, 110.6, 147.9                                     | 2.629, 3.276;<br>3.458(6), 3.751(7);<br>132.4, 107.6                                                                        | [Error!<br>Bookmark<br>not<br>defined.] |
| PAXVAM<br><i>P</i> <sub>21</sub> / <i>n</i>   | Mn | Cl | 2.881, 2.864;<br>3.690(2), 3.805(2);<br>131.2, 144.7                                                                | 2.725, 3.201, 2.701;<br>3.497(2), 3.723(3),<br>3.708(3);<br>127.6, 110.4, 153.5                                     | 2.785, 3.118;<br>3.511(2), 3.660(2);<br>124.0, 111.5                                                                        | [Error!<br>Bookmark<br>not<br>defined.] |
| HUJKIG<br><i>P</i> <sub>21</sub> / <i>n</i>   | Fe | Cl | 2.751, 2.807;<br>3.634(2), 3.730(2);<br>138.0, 142.5                                                                | 2.700, 2.986, 2.590;<br>3.423(2), 3.563(2),<br>3.618(2);<br>123.4, 113.5, 157.3                                     | 2.680, 3.037;<br>3.426(2), 3.585(2);<br>125.3, 111.7                                                                        | [Error!<br>Bookmark<br>not<br>defined.] |
| HUJKIG02<br><i>P</i> <sub>21</sub> / <i>n</i> | Fe | Cl | 2.759, 2.812;<br>3.643(2), 3.737(2);<br>138.1, 142.7                                                                | 2.709, 2.987, 2.596;<br>3.428(2), 3.564(2),<br>3.625(2);<br>123.1, 113.5, 157.5                                     | 2.687, 3.052;<br>3.435(2), 3.598(2);<br>125.5, 111.6                                                                        | [Error!<br>Bookmark<br>not<br>defined.] |
| CUBQEV<br><i>P</i> <sub>21</sub> / <i>n</i>   | Ru | Cl | 2.82, 3.04;<br>3.76(1), 3.76(1);<br>124.3, 144.6                                                                    | 2.82, 3.16, 2.79;<br>3.49(1), 3.63(1), 3.78(1);<br>119.6, 106.8, 152.2                                              | 2.74, 3.33;<br>3.58(1), 3.80(1);<br>133.6, 107.4                                                                            | [Error!<br>Bookmark<br>not<br>defined.] |
| BONRAY<br><i>P</i> <sub>21</sub> / <i>n</i>   | Ir | Cl | 2.767, 2.782;<br>3.698(4), 3.705(3);<br>143.3, 142.4                                                                | 2.782, 2.878, 2.604;<br>3.452(3), 3.509(4),<br>3.638(4);<br>119.6, 117.0, 158.2                                     | 2.682, 2.992;<br>3.420(4), 3.559(4);<br>124.6, 112.8                                                                        | [Error!<br>Bookmark<br>not<br>defined.] |
| WOLDOQ<br><i>P</i> <sub>21</sub> / <i>n</i>   | Os | Cl | 2.787, 2.850;<br>3.691(4), 3.736(4);<br>140.2, 138.5                                                                | 2.642, 3.064, 2.672;<br>3.465(4), 3.581(4),<br>3.665(4);<br>131.8, 109.7, 151.3                                     | 2.695, 3.089;<br>3.470(4), 3.584(4);<br>127.7, 108.4                                                                        | [Error!<br>Bookmark<br>not<br>defined.] |
| LOBXAD<br><i>P</i> <sub>21</sub> / <i>n</i>   | Ga | Br | 2.892, 2.970;<br>3.857(2), 3.838(3);<br>147.7, 136.9                                                                | 2.806, 3.158, 2.682;<br>3.580(3), 3.743(3),<br>3.745(3);<br>127.9, 114.8, 165.0                                     | 2.843, 3.018;<br>3.575(3), 3.651(3);<br>124.5, 117.5                                                                        | [Error!<br>Bookmark<br>not<br>defined.] |
| RARVIT<br><i>P</i> <sub>21</sub> / <i>n</i>   | Cr | Br | 2.910, 2.927;<br>3.862(2), 3.828(3);<br>146.1, 140.3                                                                | 2.805, 3.166, 2.731;<br>3.576(3), 3.750(3),<br>3.775(3);<br>127.7, 114.4, 160.6                                     | 2.833, 3.058;<br>3.573(3), 3.671(3);<br>125.1, 116.1                                                                        | [Error!<br>Bookmark<br>not<br>defined.] |
| BONREC<br><i>P</i> <sub>21</sub> / <i>n</i>   | Ir | Br | 2.94, 2.96;<br>3.87(2), 3.88(2);<br>142.0, 143.0                                                                    | 2.81, 3.13, 2.74;<br>3.58(2), 3.75(2), 3.79(2);<br>127.6, 116.2, 162.2                                              | 2.86, 2.99;<br>3.60(2), 3.66(2);<br>125.1, 119.9                                                                            | [Error!<br>Bookmark<br>not<br>defined.] |

<sup>a</sup>Green hashed lines in Figure 3b/3c; <sup>b</sup>red hashed lines in Figure 3b/3c; <sup>b</sup>blue hashed lines in Figure 3b/3c.
